# Supplementary material for: Altered bioenergetics and enhanced resistance to oxidative stress in human retinal pigment epithelial cells from donors with age-related macular degeneration
Source: PubMed Central journal article supplement — Redox Biol. 2017 Jun 1;13:255–65. doi: 10.1016/j.redox.2017.05.015 (PMC5466586; doi:10.1016/j.redox.2017.05.015), 2017-06-01
Supplement: mmc2.pdf [file mmc2.pdf]

**Supplement Figure 2. Characterization of primary RPE cultures. (A,B,C)** Immunohistochemistry and fluorescent microscopy was used to detect the cytoplasmic expression of the cellular retinoic acid binding protein (CRABP) and cellular retinaldehyde-binding protein (CRALBP), and MITF. **(D)** Western immunoblot probing for potential culture contamination by endothelial, immune, and Mast cells using antibodies that recognize CD31, CD45 and tryptase  $\alpha 1 \beta 1$  (TPSAB1), respectively. Molecular mass (kDa) is shown on left. Lysates of HUVEC cells, Jurkat cells and choroid tissue from a human donor served as positive controls (denoted by 'C'). **(E)** FACs analysis determined the number of fluorescent beads taken up by RPE from healthy (No AMD) and AMD donors. Histograms indicate the percent of cells containing one to five beads. **(F)** Western blot for antioxidants. Results from densitometry quantification are shown in Fig. 5D.
