# Supplementary material for: Altered bioenergetics and enhanced resistance to oxidative stress in human retinal pigment epithelial cells from donors with age-related macular degeneration
Source: PubMed Central journal article supplement — Redox Biol. 2017 Jun 1;13:255–65. doi: 10.1016/j.redox.2017.05.015 (PMC5466586; doi:10.1016/j.redox.2017.05.015), 2017-06-01
Supplement: mmc3.pdf [file mmc3.pdf]

**Supplement Table 1.** Donor Characteristics and Clinical Information <sup>A</sup>

| Disease State <sup>B</sup> | Sample <sup>C</sup><br>(n) | Sex |    | Age          | Time <sup>D</sup> | Cause of Death (n) <sup>E</sup>                                                                                                                                       |
|----------------------------|----------------------------|-----|----|--------------|-------------------|-----------------------------------------------------------------------------------------------------------------------------------------------------------------------|
|                            |                            | M   | F  | Mean ±<br>SD | Mean ±<br>SD      |                                                                                                                                                                       |
| No AMD                     | 31                         | 14  | 17 | 65 ± 11      | 19 ± 5            | ACE (2), ALS (1), ABI (3), Cancer (8), CHF(2), CVA (2), Heart Failure (3) ICH/ICB (2), Organ Failure (2), Pneumonia (2), PE (1), Sepsis (3)                           |
| AMD                        | 49                         | 30  | 19 | 75 ± 11      | 20 ± 3            | ACE (3), CABG (1),Cancer (10), CHF (4), COPD (1),CVA (4),Heart Failure (7), Organ Failure(3), Pneumonia (4), PE (1), Respiratory Failure (1), Sepsis (9), Unknown (1) |

ABI = Anoxic Brain Injury; ACE = acute myocardial event; ALS=amyotrophic lateral sclerosis; CABG= coronary artery bypass grafting; CHF = congestive heart failure. COPD = chronic obstructive pulmonary disease; CVA = cerebrovascular accident (stroke); Heart failure = Myocardial infarction or cardiac arrest; ICH/ ICB = Intracerebral hemorrhage/ Intracerebral bleed; Organ failure=kidney and/or multiple organ failure; PE= pulmonary embolism.

<sup>A</sup> Information supplied by Minnesota Lions Eye Bank.

<sup>B</sup> Minnesota Grading System (MGS) was used to evaluate the presence or absence of AMD in eye bank eyes (Olsen 2004).

<sup>C</sup> Sample number indicates the total donors used in the current study for each MGS stage.

<sup>D</sup> The time from death to freezing is provided in hours.

<sup>E</sup> The number of donors for each cause of death is indicated in parentheses.

**Supplement Table 2. Antibodies used for Immunohistochemistry and Western Immunoblotting.**

| <u>Antibody</u>                | <u>Type</u> | <u>Assay</u> | <u>Dilution</u> | <u>Company</u>                        |
|--------------------------------|-------------|--------------|-----------------|---------------------------------------|
| RPE65                          | P           | W            | 1:2000          | Dr. T. Michael Redmond, NEI           |
| Bestrophin                     | M           | W, I         | 1:1000, 1:500   | Novus Biologicals, Littleton, CO      |
| CRABP                          | M           | I            | 1:250           | Sigma-Aldrich, St. Louis, MO          |
| CRALBP                         | M           | W, I         | 1:1000, 1:500   | Novus Biologicals, Littleton, CO      |
| NaK ATPase                     | M           | W, I         | 1:1000, 1:250   | Novus Biologicals, Littleton, CO      |
| MCT3                           | P           | W            | 1:200           | Santa Cruz Biotechnology, Dallas, TX  |
| Ezrin                          | P           | W            | 1:1000          | Cell Signaling, Danvers, MA           |
| ZO-1                           | M           | I            | 1:100           | Life Technologies, Grand Island, NY   |
| Otx2                           | P           | I            | 1:500           | EMD Millipore, Darmstadt, Germany     |
| MitF                           | M           | I            | 1:200           | Abcam, Cambridge, MA                  |
| CD31                           | M           | W            | 1:1000          | Cell Signaling, Danvers, MA           |
| CD45                           | M           | W            | 1:1000          | Cell Signaling, Danvers, MA           |
| Mast Cell Tryptase             | M           | W            | 1:1000          | Novus Biologicals, Littleton, CO      |
| B-Actin                        | M           | W            | 1:5000          | Santa Cruz Biotechnology, Dallas, TX  |
| SRXN1                          | P           | W            | 1:1000          | Abcam, Cambridge, MA                  |
| GPX1                           | M           | W            | 1:1000          | Cell Signaling, Danvers, MA           |
| PRDX3                          | P           | W            | 1:1000          | Abcam, Cambridge, MA                  |
| GST $\pi$                      | M           | W            | 1:5000          | Novus Biologicals, Littleton, CO      |
| Catalase                       | M           | W            | 1:2000          | Sigma-Aldrich, St. Louis, MO          |
| PGC1 $\alpha$                  | M           | W            | 1:1000          | EMD Millipore, Darmstadt, Germany     |
| <u>PPAR<math>\alpha</math></u> | <u>M</u>    | <u>W</u>     | <u>1:1000</u>   | <u>Abcam, Cambridge, MA</u>           |
| <u>CuZnSOD (SOD1)</u>          | <u>P</u>    | <u>W</u>     | <u>1:1000</u>   | <u>Stressgen, Victoria, BC Canada</u> |
| <u>MnSOD (SOD2)</u>            | <u>P</u>    | <u>W</u>     | <u>1:1000</u>   | <u>Abcam, Cambridge, MA</u>           |

Monoclonal (M), polyclonal (P), Immunohistochemistry (I), Western Immunoblotting (W).

**Supplement Table 3. Primers for qPCR Analysis**

| Gene                             | Gene ID |         | Sequence 5'-3'             | Amplicon (bp) | Annealing Temp |
|----------------------------------|---------|---------|----------------------------|---------------|----------------|
| <b>Cell Characterization</b>     |         |         |                            |               |                |
| <b>MITF</b>                      | 4286    | Forward | CCCAGTTCATGCAACAGAGAG      | 79            | 59             |
|                                  |         | Reverse | GCAGAGGGAAGGGTGGTG         |               |                |
| <b>RPE65</b>                     | 6121    | Forward | CGTATGGACTTGGCTTGAATC      | 129           | 59             |
|                                  |         | Reverse | CTGGGTGAGAAACAAAGATGG      |               |                |
| <b>PMEL17</b>                    | 6490    | Forward | TGATGGCTGTGGTCCTTGC        | 94            | 59             |
|                                  |         | Reverse | CAGTGACTGCTGCTATGTGG       |               |                |
| <b>PEDF</b>                      | 5176    | Forward | TATCACCTTAACCAGCCTTTC      | 83            | 59             |
|                                  |         | Reverse | GGGTCCAGAATCTTGCCAATG      |               |                |
| <b>TYRP1</b>                     | 7306    | Forward | GATTCCACTCTAATAAGCCCAAA    | 198           | 59             |
|                                  |         | Reverse | TTCCAAGCACTGAGCGACAT       |               |                |
| <b>BEST1</b>                     | 7439    | Forward | TAGAACCATCAGCGCCGTC        | 261           | 59             |
|                                  |         | Reverse | TGAGTGTAGTGTGTATGTTGG      |               |                |
| <b>RBP1</b>                      | 5947    | Forward | CAGGTTGGGAAGGAGTTTGA       | 168           | 59             |
|                                  |         | Reverse | TGGTGGCGTGTGACTGTAAT       |               |                |
| <b>GAPDH</b>                     | 2597    | Forward | GAGTCAACGGATTTGGTCGT       | 185           | 59             |
|                                  |         | Reverse | GACAAGCTTCCCCTTCTCAG       |               |                |
| <b>mtDNA Content</b>             |         |         |                            |               |                |
| <b>Total mtDNA Set 1</b>         | 4550    | Forward | CCCCACAAACCCCACTACTAAACCCA | 222           | 55             |
|                                  |         | Reverse | TTTCATCATGCGGAGATGTTGGATGG |               |                |
| <b>Total mtDNA Set 2</b>         | 4519    | Forward | CAGTGAAATTGACCTGCCCGTGAA   | 191           | 55             |
|                                  |         | Reverse | TCTTAGCATGTACTGCTCGGAGGT   |               |                |
| <b>β-globin</b>                  | 3043    | Forward | CTTGGGTTTCTGATAGGCAC       | 147           | 60             |
|                                  |         | Reverse | CTTAGGGTTGCCATAACAG        |               |                |
| <b>Oxidative Stress Response</b> |         |         |                            |               |                |
| <b>ARBP</b>                      | 6175    | Forward | CGACCTGGAAGTCCAACACTAC     | 109           | 58             |
|                                  |         | Reverse | ATCTGCTGCATCTGCTTG         |               |                |
| <b>HO-1</b>                      | 3162    | Forward | CCAGCGGGCCACAACAAAGT       | 262           | 58             |
|                                  |         | Reverse | GCCTTCAGTGCCACGGTAAGG      |               |                |
| <b>NQO1</b>                      | 1728    | Forward | AAAGGACCCTTCCGGAGTAA       | 222           | 58             |
|                                  |         | Reverse | CCATCCTTCCAGGATTTGAA       |               |                |
| <b>SOD2</b>                      | 6648    | Forward | GTGTGGGAGCAGCCTTACTA       | 153           | 58             |
|                                  |         | Reverse | AGAGCTTAACATACTCAGCATAACG  |               |                |
| <b>CAT</b>                       | 847     | Forward | GATAGCCTTCGACCCAAGCAAC     | 201           | 58             |
|                                  |         | Reverse | TGATTGTCCTGCATGCACATCG     |               |                |
| <b>SOD1</b>                      | 6647    | Forward | GTGCAGGTCTCACTTTAATCCTC    | 212           | 58             |
|                                  |         | Reverse | ACCTTTGCCCAAGTGATCTGC      |               |                |
| <b>NRF2</b>                      | 4780    | Forward | TCCAGTCAGAAACCAGTGGAT      | 107           | 58             |
|                                  |         | Reverse | GAATGTCTGCGCCAAAAGCTG      |               |                |
| <b>PGC1α</b>                     | 10891   | Forward | GTCACCACCCAAATCCTTAT       | 131           | 59             |
|                                  |         | Reverse | ATCTACTGCCTGGAGACCTT       |               |                |
| <b>PPARα</b>                     | 5465    | Forward | ATCGAATGTAGAATCTGCGGG      | 116           | 60             |
|                                  |         | Reverse | TCGCACTTGTGCATACACCAG      |               |                |
| <b>CYTC</b>                      | 54205   | Forward | CTTCGGAGCGGGAGTGTTCCG      | 229           | 59             |
|                                  |         | Reverse | CAGATGATGCCTTTGTTCTTATTG   |               |                |
| <b>PPARγ</b>                     | 5468    | Forward | AGGCGAGGGCGATCTTGACAG      | 150           | 59             |
|                                  |         | Reverse | GATGCGGATGGCCACCTCTTT      |               |                |
| <b>GPX1</b>                      | 2876    | Forward | CCAGTCGGTGTATGCCTTCTC      | 107           | 61             |
|                                  |         | Reverse | CGAGAATGTGGCGTCCCTC        |               |                |
